# Supplementary material for: Widespread nociceptive maps in the human neonatal somatosensory cortex
Source: eLife. 2022 Apr 22;11:e71655. doi: 10.7554/eLife.71655 (PMC9090328; doi:10.7554/eLife.71655)
Supplement: Figure 1—source data 1. [file elife-71655-fig1-data1.xlsx]

## Sheet: Sheet4
Stimulus	Channel	Max Δ[HbO] µM	Min Δ[HbO] µM	Direction of sig. Δ	p value	Max Δ[Hb] µM	Min Δ[Hb] µM	Direction of sig. Δ	p value
Heel lance	FTT7h	0.14 (6.8s)	-0.79 (15.9s)	↓	<.001 - .012	0.05 (0.1s)	-0.38 (7.1s)		ns
	FCC5	-0.01 (8.2s)	-0.97 (22.7s)	↓	<.001 - .010	0.27 (22.9s)	-0.42 (8.2s)	↓	<.001 - .026
	FCC3	0.03 (1.9s)	-0.61 (20.5s)	↓	<.001 - .014	0.03 (23.1s)	-1.03 (9.1s)	↓	<.001 - .012
	FCC1	0.1 (8.9s)	-0.86 (23s)	↓	<.001 - .012	0.09 (22.6s)	-0.67 (8.3s)	↓	<.001 - .011
	T7h	0.24 (5s)	-0.67 (19.9s)	↓	<.001 - .016	0.62 (3.1s)	-0.12 (28.2s)	↑	<.001 - .007
	C5h	0.6 (12s)	-0.05 (2.1s)	↑	<.001 - .011	0.03 (18s)	-0.41 (7.3s)	↓	<.001 - .014
	C3h	0.53 (5.6s)	-0.2 (25.6s)	↑	<.001 - .018	0 (0.1s)	-0.99 (8.2s)	↓	<.001 - .016
	C1h	-0.18 (15.2s)	-0.62 (22.2s)	↓	<.001 - .012	0.39 (27.9s)	-0.47 (10.9s)	↑/↓	<.001 - .021
	C2h	0.31 (12.8s)	-0.58 (30s)	↓	<.001 - .013	0.68 (4.4s)	-0.13 (18.5s)	↑	<.001 - .013
	CCP5	0.31 (7.2s)	-0.36 (16.4s)		ns	0.62 (2.9s)	-0.02 (26.3s)	↑	<.001 - .033
	CCP3	0.94 (14.4s)	-0.11 (2.7s)	↑	<.001 - .018	0.13 (22.9s)	-0.35 (11s)	↓	<.001 - .021
	CCP1	0.62 (8.2s)	-0.25 (29.6s)	↑	<.001 - .018	0.04 (17.8s)	-0.61 (11.3s)	↓	<.001 - .011
	CP3h	0.96 (14.5s)	-0.45 (28s)	↑	<.001 - .012	0.01 (30s)	-0.56 (9.7s)	↓	<.001 - .057
	CP1h	0.71 (15.7s)	0.02 (2.6s)	↑	<.001 - .016	0 (30s)	-0.39 (13s)	↓	<.001 - .022
	CP2h	0.46 (17s)	0.1 (0.1s)		ns	0.72 (20.7s)	0.12 (0.9s)	↑	<.001 - .010
	CPP1	0.91 (14.1s)	-0.39 (29.3s)	↑	<.001 - .010	0.44 (5s)	-0.12 (12.2s)	↑	<.001 - .012
	P7	0.52 (12.1s)	-0.19 (24.3s)	↑	<.001 - .011	0.28 (23.6s)	-0.12 (14.2s)	↑	<.001 - .025
Heel touch	FTT7h	0.08 (7s)	-0.26 (30s)	↓	<.001 - .016	0.12 (26.9s)	-0.09 (12s)	↑/↓	<.001 - .020
	FCC5	0.09 (5.7s)	-0.11 (30s)		ns	0.12 (30s)	-0.02 (8.3s)	↑	<.001 - .015
	FCC3	0.06 (2.6s)	-0.17 (15.1s)	↓	<.001 - .038	0.08 (30s)	-0.21 (11.1s)	↓	<.001 - .014
	FCC1	0.01 (8.1s)	-0.14 (24.4s)	↓	<.001 - .013	0.05 (30s)	-0.17 (11.1s)	↓	<.001 - .013
	T7h	0.07 (10.6s)	-0.09 (30s)		ns	0.04 (28.2s)	-0.05 (13.1s)		ns
	C5h	0.07 (9.2s)	-0.02 (28.3s)		ns	0.03 (30s)	-0.12 (11.1s)	↓	<.001 - .022
	C3h	0.03 (1.1s)	-0.16 (24.3s)	↓	<.001 - .011	0 (24.8s)	-0.15 (11.3s)	↓	<.001 - .021
	C1h	0.2 (14.2s)	-0.1 (24.3s)	↑	<.001 - .014	0.06 (30s)	-0.14 (9.7s)	↓	<.001 - .013
	C2h	0.19 (9.2s)	-0.1 (30s)	↑	<.001 - .016	0.08 (24.9s)	-0.1 (12.3s)	↓	<.001 - .013
	CCP5	0.06 (10.4s)	-0.11 (28.7s)	↓	<.001 - .010	0.11 (28.1s)	-0.08 (11.3s)	↑/↓	<.001 - .014
	CCP3	0.02 (9.2s)	-0.08 (25s)		ns	0.1 (24.7s)	-0.09 (9.6s)	↑/↓	<.001 - .016
	CCP1	0.15 (14.3s)	0 (24.4s)	↑	<.001 - .011	0.04 (4.2s)	-0.07 (23.8s)	↓	<.001 - .019
	CP3h	0.12 (13.5s)	-0.05 (5.2s)	↑	<.001 - .011	0.06 (4.4s)	-0.13 (13.7s)	↓	<.001 - .011
	CP1h	0.23 (14.9s)	0 (30s)	↑	<.001 - .018	0.07 (4.1s)	-0.1 (25.4s)	↓	<.001 - .010
	CP2h	0.04 (9s)	-0.09 (26.9s)		ns	0.02 (4.7s)	-0.16 (28s)	↓	<.001 - .029
	CPP1	0.35 (15.8s)	0.03 (0.1s)	↑	<.001 - .023	0.08 (14.9s)	-0.01 (29.5s)	↑	ns
	P7	0.14 (16.8s)	-0.11 (30s)	↑	<.001 - .013	0.09 (19.9s)	-0.09 (9.1s)	↑/↓	<.001 - .012
Hand touch	FTT7h	0.29 (11.4s)	-0.07 (23.4s)	↑	<.001 - .012	0.06 (26.1s)	-0.08 (3.4s)		ns
	FCC5	0.33 (9.2s)	0.02 (1s)	↑	<.001 - .025	0.05 (30s)	-0.14 (8.8s)	↓	<.001 - .011
	FCC3	0.27 (17.1s)	-0.09 (1s)	↑	<.001 - .019	0.04 (30s)	-0.15 (11.5s)		ns
	FCC1	0.17 (19s)	-0.01 (6s)	↑	<.001 - .012	-0.02 (7.2s)	-0.18 (17.6s)	↓	<.001 - .018
	T7h	0.05 (30s)	-0.1 (4.8s)		ns	0.17 (4.7s)	-0.04 (14.8s)		ns
	C5h	0.2 (9.5s)	-0.04 (29.8s)	↑	<.001 - .011	0.09 (30s)	-0.11 (11.2s)	↓	<.001 - .010
	C3h	0.05 (16.5s)	-0.17 (30s)	↓	<.001 - .010	0.13 (29.2s)	-0.06 (0.9s)	↑	<.001 - .013
	C1h	0.19 (11.3s)	-0.13 (24.2s)		ns	0.12 (23.9s)	-0.15 (11.7s)	↓	<.001 - .010
	C2h	0.08 (2.5s)	-0.29 (28.9s)	↓	<.001 - .011	0.19 (24.2s)	-0.11 (6.2s)	↑	<.001 - .015
	CCP5	0.06 (15.7s)	-0.11 (7.6s)		ns	0.03 (23s)	-0.07 (15.1s)		ns
	CCP3	0.12 (5.5s)	-0.15 (30s)	↑/↓	<.001 - .016	0.11 (26.7s)	-0.14 (9.5s)	↓	<.001 - .013
	CCP1	0.1 (3s)	-0.15 (26.9s)	↓	<.001 - .013	0.12 (30s)	-0.09 (8.6s)	↑	<.001 - .017
	CP3h	0.09 (3s)	-0.21 (20.4s)	↓	<.001 - .015	0.08 (27.9s)	-0.14 (10.1s)	↓	<.001 - .025
	CP1h	0.14 (3.1s)	-0.11 (23.5s)		ns	0.02 (29s)	-0.13 (6.4s)	↓	<.001 - .020
	CP2h	0.11 (2.4s)	-0.15 (16.7s)		ns	0.13 (24.9s)	-0.01 (10.2s)	↑	<.001 - .034
	CPP1	0.07 (1.4s)	-0.04 (8.4s)		ns	-0.03 (1.7s)	-0.14 (16.1s)	↓	<.001 - .017
	P7	0.13 (27s)	-0.05 (17.2s)	↑	<.001 - .013	0.05 (26.7s)	-0.03 (18.6s)		ns
