# Supplementary material for: Widespread nociceptive maps in the human neonatal somatosensory cortex
Source: eLife. 2022 Apr 22;11:e71655. doi: 10.7554/eLife.71655 (PMC9090328; doi:10.7554/eLife.71655)
Supplement: Figure 3—source data 1. — Parameter estimates for the change in oxygenated haemoglobin (Δ[HbO]) and deoxygenated haemoglobin (Δ[Hb]) following a heel lance and heel touch, and p value from statistical comparison. A two-tailed test was used (α = 0.025) for all parameters except peak location (α = 0.05). The Euclidean distance between the heel touch and heel lance peak locations has been provided rather than x, y, z coordinates of each peak. Linked to Figure 3 and Figure 3—figure supplement 1 . [file elife-71655-fig3-data1.xlsx]

## Sheet: Sheet1
	Δ[HbO]			Δ[Hb]
Parameter	Lance	Heel touch	p value	Lance	Heel touch	p value
Overall area (mm²)	455.27	259.51	0.009	475.24	95.53	<.001
Peak amplitude (µM)	16.06	5.43	0.001	-22.54	-6.62	<.001
Peak latency (s)	14	16	0.358	9.5	28	0.028
Peak location (mm)	Euclidean distance = 1.65		0.156	Euclidean distance = 51.88		0.041
Peak spread (mm²)	51.41	43.79	0.019	15.31	4.63	<.001
